# Supplementary material for: Modulation of the gut microbiota by the mixture of fish oil and krill oil in high-fat diet-induced obesity mice
Source: PubMed Central journal article supplement (PMC5633193; doi:10.1371/journal.pone.0186216), 2017-10-09
Supplement: pone.0186216.s001.pdf [file pone.0186216.s001.pdf]

**S1 Table. The component of fatty acid in krill oil and fish oil**

| No. | compound                        | peak area(%) |           |
|-----|---------------------------------|--------------|-----------|
|     |                                 | fish oil     | krill oil |
| 1   | Dodecanoic acid                 | -            | 0.719288  |
| 2   | Tetradecanoate                  | 3.419262     | 26.70243  |
| 3   | Pentadecanoic acid              | 1.294267     | 1.024069  |
| 4   | Hexadecanoic acid               | 20.55666     | -         |
| 5   | Heptadecanoic acid              | 1.583855     | -         |
| 6   | Stearate                        | 6.535653     | 2.098533  |
| 7   | Eicosanoic acid                 | 0.568188     | -         |
| 8   | 11-Eicosenoic acid              | 1.061908     | -         |
| 9   | 7-Hexadecenoic acid             | 0.803279     | -         |
| 10  | 9-Hexadecenoic acid             | 4.670319     | 0.583936  |
| 11  | 9,12-Hexadecadienoic acid       | -            | 0.837743  |
| 12  | 6-Hexadecenoic acid             | 1.906902     | -         |
| 13  | 4,7,10,13-Hexadecatetraenoate   | -            | 0.580976  |
| 14  | 6,9,12,15-Hexadecatetraenoate   | -            | 2.394496  |
| 15  | 11-Octadecenoic acid            | -            | 10.13226  |
| 16  | 9-Octadecenoic acid             | 14.07874     | 16.01075  |
| 17  | Octadecanoic acid               | 2.207219     | -         |
| 18  | 11,14-Octadecadienoic acid      | 1.385156     | 3.336659  |
| 19  | 9,12-Octadecadienoic acid       | 0.638078     | 4.083951  |
| 20  | 9,12,15-Octadecatrienoic acid   | 0.458493     | -         |
| 21  | Stearidonate                    | 0.719468     | 9.771288  |
| 22  | 10,13-Eicosadienoic acid,       | 0.985108     | -         |
| 23  | 5,8,11,14-Eicosatetraenoic acid | 2.256837     | -         |
| 24  | 8,11,14,17-Eicosatetraenoate    | -            | -         |
| 25  | EPA                             | 5.673304     | 17.81914  |
| 26  | 13-Docosenoic acid              | -            | -         |
| 27  | 4,7,10,13,16-Docosapentaenoate  | 2.681636     | -         |
| 28  | 7,10,13,16,19-Docosapentaenoate | 0.758215     | -         |
| 29  | DHA                             | 25.75744     | 3.904475  |
