# Supplementary material for: Modulation of the gut microbiota by the mixture of fish oil and krill oil in high-fat diet-induced obesity mice
Source: PubMed Central journal article supplement (PMC5633193; doi:10.1371/journal.pone.0186216), 2017-10-09
Supplement: pone.0186216.s002.pdf [file pone.0186216.s002.pdf]

**Table S2. The body weight of mice fed experimental diets.** Data are presented as the means  $\pm$  S.D and analyzed by ANOVA followed by Tukey post hoc test. \* $P < 0.05$ , \*\*  $P < 0.01$  and \*\*\* $P < 0.001$  vs the HFD group.

|                | Normal diet        |                  | High -fat diet      |                    |                    |                    |                    |                   |
|----------------|--------------------|------------------|---------------------|--------------------|--------------------|--------------------|--------------------|-------------------|
|                | Control            | HFD              | HFD+M               | HFD+FO600          | HFD+KO600          | FO300KO300         | FO400KO200         | FO450KO150        |
| Initial BW (g) | 23.33 $\pm$ 3.23   | 22.16 $\pm$ 2.65 | 23.97 $\pm$ 3.13    | 23.44 $\pm$ 2.46   | 23.26 $\pm$ 3.17   | 24.12 $\pm$ 3.43   | 23.66 $\pm$ 2.01   | 24.01 $\pm$ 3.19  |
| Final BW(g)    | 32.14 $\pm$ 3.72   | 44.93 $\pm$ 4.21 | 37.86 $\pm$ 4.01    | 41.63 $\pm$ 3.17   | 40.13 $\pm$ 4.36   | 38.77 $\pm$ 4.21   | 41.26 $\pm$ 4.33   | 43.17 $\pm$ 4.13  |
| BW gain (g)    | 9.47 $\pm$ 1.33*** | 22.66 $\pm$ 1.67 | 13.44 $\pm$ 2.03*** | 17.62 $\pm$ 1.56** | 16.27 $\pm$ 1.78** | 14.61 $\pm$ 2.21** | 17.81 $\pm$ 1.88** | 19.32 $\pm$ 1.32* |
