# Supplementary material for: Modulation of the gut microbiota by the mixture of fish oil and krill oil in high-fat diet-induced obesity mice
Source: PubMed Central journal article supplement (PMC5633193; doi:10.1371/journal.pone.0186216), 2017-10-09
Supplement: pone.0186216.s003.pdf [file pone.0186216.s003.pdf]

**Table S3. Effect of supplementation with oil on plasma biochemical indicators of mice fed an HFD.** Data are represented as the means  $\pm$  S.D and analyzed by ANOVA followed by Tukey post hoc test. \*\*\* $P<0.001$ , \*\* $P<0.01$  and \* $P<0.05$  all group compared with the Control group.

|       | Control         | HFD                | HFD+M              | HFD+FO600         | HFD+KO600          | HFD+FO300KO300     | HFD+FO400KO200     | HFD+FO450KO150     |
|-------|-----------------|--------------------|--------------------|-------------------|--------------------|--------------------|--------------------|--------------------|
| TC    | 3.72 $\pm$ 0.56 | 5.02 $\pm$ 1.14*** | 4.37 $\pm$ 0.77*** | 4.73 $\pm$ 1.21*  | 4.45 $\pm$ 1.01*   | 4.4 $\pm$ 1.17**   | 4.43 $\pm$ 0.98**  | 4.59 $\pm$ 1.45    |
| TG    | 0.75 $\pm$ 0.12 | 1.57 $\pm$ 0.54**  | 0.99 $\pm$ 0.14*** | 1.39 $\pm$ 0.73   | 1.28 $\pm$ 0.68*   | 1.21 $\pm$ 0.76*** | 1.28 $\pm$ 0.25*   | 1.29 $\pm$ 0.39*   |
| HDL-C | 5.19 $\pm$ 1.69 | 4.07 $\pm$ 1.07*** | 4.96 $\pm$ 1.21*** | 4.51 $\pm$ 1.14** | 4.85 $\pm$ 1.22**  | 4.88 $\pm$ 1.24**  | 4.79 $\pm$ 1.31*   | 4.78 $\pm$ 1.33    |
| LDL-C | 1.01 $\pm$ 0.47 | 2.17 $\pm$ 0.76*** | 1.25 $\pm$ 0.63*** | 1.98 $\pm$ 0.55*  | 1.43 $\pm$ 0.73*** | 1.37 $\pm$ 0.62*** | 1.41 $\pm$ 0.54*** | 1.47 $\pm$ 0.69*** |
