# Supplementary material for: Modulation of the gut microbiota by the mixture of fish oil and krill oil in high-fat diet-induced obesity mice
Source: PubMed Central journal article supplement (PMC5633193; doi:10.1371/journal.pone.0186216), 2017-10-09
Supplement: pone.0186216.s004.pdf [file pone.0186216.s004.pdf]

**Table S4.** Summary of sequence reads after quality control

| Group          | Raw num | Clean num | Out target num | Chimeras num | Filtered num |
|----------------|---------|-----------|----------------|--------------|--------------|
| Control        | 35233   | 34330     | 616            | 2479         | 31235        |
| HFD            | 32397   | 31717     | 869            | 1771         | 29077        |
| HFD+M          | 34571   | 33881     | 1453           | 1164         | 31264        |
| HFD+FO600      | 32265   | 31213     | 1144           | 2034         | 28035        |
| HFD+KO600      | 40649   | 39699     | 863            | 3176         | 35660        |
| HFD+FO300KO300 | 37239   | 36384     | 820            | 3029         | 32535        |
| HFD+FO400KO200 | 37272   | 36491     | 1670           | 1301         | 33520        |
| HFD+FO450KO150 | 41951   | 41081     | 1872           | 2775         | 36434        |
