# Supplementary material for: Modulation of the gut microbiota by the mixture of fish oil and krill oil in high-fat diet-induced obesity mice
Source: PubMed Central journal article supplement (PMC5633193; doi:10.1371/journal.pone.0186216), 2017-10-09
Supplement: pone.0186216.s005.pdf [file pone.0186216.s005.pdf]

**S5 Table. Microbial diversity of each group.** Data are represented as the means  $\pm$  S.D. and analyzed by Mann-Whitney test, \*\* $P < 0.01$  and \* $P < 0.05$  vs the HFD group.

| Groups         | Shannon index    | ACE index           | Chao1 index        | Simpson            | Coverage |
|----------------|------------------|---------------------|--------------------|--------------------|----------|
| Control        | 5.20 $\pm$ 0.43  | 2730.77 $\pm$ 524   | 2108.47 $\pm$ 432  | 0.01 $\pm$ 0.0024  | 0.98     |
| HFD            | 4.59 $\pm$ 0.74* | 2702.35 $\pm$ 423   | 1920.25 $\pm$ 324  | 0.03 $\pm$ 0.0015* | 0.98     |
| HFD+M          | 4.89 $\pm$ 1.07* | 2449.08 $\pm$ 376   | 1777.53 $\pm$ 354* | 0.02 $\pm$ 0.0031  | 0.98     |
| HFD+FO600      | 4.78 $\pm$ 1.21  | 1935.63 $\pm$ 234** | 1472.04 $\pm$ 315* | 0.02 $\pm$ 0.0019  | 0.99     |
| HFD+KO600      | 4.86 $\pm$ 0.88  | 2743.34 $\pm$ 643   | 2122.68 $\pm$ 327  | 0.02 $\pm$ 0.0043  | 0.98     |
| HFD+FO300KO300 | 5.1 $\pm$ 0.97   | 2776.64 $\pm$ 387   | 2216.93 $\pm$ 369  | 0.02 $\pm$ 0.0052  | 0.98     |
| HFD+FO400KO200 | 4.86 $\pm$ 1.01  | 2907.67 $\pm$ 424*  | 2111.37 $\pm$ 433  | 0.02 $\pm$ 0.0033  | 0.98     |
| HFD+FO450KO150 | 4.75 $\pm$ 1.24* | 3017.46 $\pm$ 412*  | 2346.54 $\pm$ 451  | 0.03 $\pm$ 0.0065  | 0.98     |
