# Supplementary material for: Modulation of the gut microbiota by the mixture of fish oil and krill oil in high-fat diet-induced obesity mice
Source: PubMed Central journal article supplement (PMC5633193; doi:10.1371/journal.pone.0186216), 2017-10-09
Supplement: pone.0186216.s006.pdf [file pone.0186216.s006.pdf]

**Table S6.** RDP classification of the sequence ratio at phylum level. Data are represented as the means  $\pm$  S.D and analysed by Mann-Whitney test. \*\*\* $P<0.001$ , \*\* $P<0.01$  and \* $P<0.05$  vs the HFD group.

| Phylum                             | Control (%)                       | HFD (%)          | HFD+M (%)                        | HFD+FO600 (%)                    | HFD+KO600 (%)                    | HFD+<br>FO300KO300 (%)           | HFD+<br>FO400KO200 (%)         | HFD+<br>FO450KO150 (%)         |
|------------------------------------|-----------------------------------|------------------|----------------------------------|----------------------------------|----------------------------------|----------------------------------|--------------------------------|--------------------------------|
| <i>Bacteroidetes</i>               | 68.44 $\pm$ 4.67 $\uparrow$ ***   | 33.88 $\pm$ 3.21 | 43.3 $\pm$ 4.22 $\uparrow$ ***   | 34.58 $\pm$ 4.21 $\uparrow$      | 53.96 $\pm$ 4.31 $\uparrow$ ***  | 44.11 $\pm$ 5.42 $\uparrow$ ***  | 40.06 $\pm$ 5.17 $\uparrow$ ** | 32.87 $\pm$ 4.88 $\downarrow$  |
| <i>Firmicutes</i>                  | 24.13 $\pm$ 2.42 $\downarrow$ *** | 46.93 $\pm$ 3.34 | 39.68 $\pm$ 3.17 $\downarrow$ ** | 40.87 $\pm$ 3.47 $\downarrow$ ** | 38.55 $\pm$ 8.75 $\downarrow$ ** | 36.32 $\pm$ 3.41 $\downarrow$ ** | 47.23 $\pm$ 3.43 $\uparrow$    | 44.58 $\pm$ 5.87 $\downarrow$  |
| <i>Proteobacteria</i>              | 4.76 $\pm$ 1.22 $\downarrow$ **   | 15.89 $\pm$ 2.33 | 11.56 $\pm$ 2.19 $\downarrow$ *  | 22.83 $\pm$ 2.21 $\uparrow$ **   | 4.67 $\pm$ 1.15 $\downarrow$ **  | 11.87 $\pm$ 2.45 $\downarrow$ ** | 6.9 $\pm$ 2.13 $\downarrow$ ** | 18.76 $\pm$ 2.16 $\uparrow$ *  |
| <i>Actinobacteria</i>              | 2.17 $\pm$ 0.89 $\uparrow$        | 1.74 $\pm$ 0.67  | 4.29 $\pm$ 1.78 $\uparrow$ *     | 0.79 $\pm$ 0.11 $\downarrow$ **  | 1.25 $\pm$ 0.32 $\downarrow$     | 5.1 $\pm$ 1.88 $\uparrow$ *      | 3.65 $\pm$ $\uparrow$ *        | 2.32 $\pm$ 0.88 $\uparrow$     |
| <i>Cyanobacteria/Chloroplast</i>   | 0.15 $\pm$ 0.04 $\downarrow$      | 0.3 $\pm$ 0.02   | 0.36 $\pm$ 0.13 $\uparrow$       | 0.1 $\pm$ 0.012 $\downarrow$     | 0.21 $\pm$ 0.05 $\downarrow$     | 1.09 $\pm$ 0.21 $\uparrow$ *     | 0.98 $\pm$ 0.12 $\uparrow$ *   | 0.48 $\pm$ 0.16 $\uparrow$     |
| <i>Planctomycetes</i>              | 0.12 $\pm$ 0.02 $\downarrow$ *    | 0.22 $\pm$ 0.11  | 0.33 $\pm$ 0.10 $\uparrow$       | 0.08 $\pm$ 0.001 $\downarrow$ *  | 0.16 $\pm$ 0.07 $\downarrow$     | 0.68 $\pm$ 0.04 $\uparrow$ *     | 0.54 $\pm$ 0.16 $\uparrow$ *   | 0.22 $\pm$ 0.09                |
| <i>Deferribacteres</i>             | 0.01 $\pm$ 0.001 $\downarrow$ *   | 0.28 $\pm$ 0.12  | 0.05 $\pm$ 0.01 $\downarrow$ **  | 0.45 $\pm$ 0.06 $\uparrow$ *     | 0.61 $\pm$ 0.11 $\uparrow$ *     | 0.18 $\pm$ 0.08 $\downarrow$     | 0.02 $\pm$ 0.01 $\downarrow$   | 0.41 $\pm$ 0.07 $\uparrow$ *   |
| <i>Candidatus Saccharibacteria</i> | 0.05 $\pm$ 0.01 $\downarrow$ **   | 0.46 $\pm$ 0.11  | 0.15 $\pm$ 0.02 $\downarrow$ **  | 0.15 $\pm$ 0.02 $\downarrow$ *   | 0.34 $\pm$ 0.08 $\downarrow$     | 0.05 $\pm$ 0.01 $\downarrow$ *   | 0.04 $\pm$ 0.01 $\downarrow$ * | 0.07 $\pm$ 0.01 $\downarrow$ * |
| <i>Verrucomicrobia</i>             | 0.07 $\pm$ 0.02 $\downarrow$      | 0.15 $\pm$ 0.03  | 0.14 $\pm$ 0.01 $\downarrow$     | 0.04 $\pm$ 0.001 $\downarrow$ *  | 0.06 $\pm$ 0.01 $\downarrow$ *   | 0.38 $\pm$ 0.10 $\uparrow$ *     | 0.29 $\pm$ 0.07 $\uparrow$ *   | 0.14 $\pm$ 0.03 $\downarrow$   |
| <i>Unclassified</i>                | 0.05 $\pm$ 0.01 $\downarrow$      | 0.07 $\pm$ 0.01  | 0.07 $\pm$ 0.02 $\downarrow$     | 0.08 $\pm$ 0.023 $\uparrow$      | 0.11 $\pm$ 0.02 $\uparrow$       | 0.04 $\pm$ 0.01 $\downarrow$     | 0.13 $\pm$ 0.04 $\uparrow$     | 0.08 $\pm$ 0.01 $\uparrow$     |
