# Supplementary material for: Modulation of the gut microbiota by the mixture of fish oil and krill oil in high-fat diet-induced obesity mice
Source: PubMed Central journal article supplement (PMC5633193; doi:10.1371/journal.pone.0186216), 2017-10-09
Supplement: pone.0186216.s008.pdf [file pone.0186216.s008.pdf]

**S8 Table. Eight abundant genera in all groups genus.** Data are presented as the means  $\pm$  S.D and analyzed by Mann-Whitney test, \*\*\* $P$ <0.001, \*\* $P$ <0.01 and \* $P$ <0.05 vs the HFD group.

| Phylum                | Genus                   | Control (%)                      | HFD (%)          | HFD+M (%)                       | HDHF+FO600 (%)                  | HFD+KO600 (%)                   | HFD+FO300KO300 (%)              | HFD+FO400KO200 (%)             | HFD+FO450KO150 (%)              |
|-----------------------|-------------------------|----------------------------------|------------------|---------------------------------|---------------------------------|---------------------------------|---------------------------------|--------------------------------|---------------------------------|
| <i>Bacteroidetes</i>  | <i>Barnesiella</i>      | 38.02 $\pm$ 4.63 $\uparrow$ ***  | 26.33 $\pm$ 2.13 | 29.87 $\pm$ 3.26* $\uparrow$    | 17.05 $\pm$ 2.54** $\downarrow$ | 21.36 $\pm$ 4.23* $\downarrow$  | 34.78 $\pm$ 3.87** $\uparrow$   | 31.91 $\pm$ 3.63** $\uparrow$  | 19.98 $\pm$ 4.83** $\downarrow$ |
| <i>Proteobacteria</i> | <i>Bilophila</i>        | 1.4 $\pm$ 0.74 $\downarrow$ ***  | 4.67 $\pm$ 1.11  | 5.32 $\pm$ 1.37 $\uparrow$      | 10.82 $\pm$ 3.63*** $\uparrow$  | 10.56 $\pm$ 2.71*** $\uparrow$  | 1.26 $\pm$ 0.53*** $\downarrow$ | 2.67 $\pm$ 1.13** $\downarrow$ | 6.71 $\pm$ 1.21** $\uparrow$    |
| <i>Firmicutes</i>     | <i>Lactobacillus</i>    | 0.81 $\pm$ 0.03 $\downarrow$ *** | 8.00 $\pm$ 2.11  | 9.69 $\pm$ 5.41* $\uparrow$     | 1.42 $\pm$ 0.25*** $\downarrow$ | 6.19 $\pm$ 1.77* $\downarrow$   | 1.08 $\pm$ 0.42*** $\downarrow$ | 5.56 $\pm$ 1.20* $\downarrow$  | 3.75 $\pm$ 1.10* $\downarrow$   |
| <i>Firmicutes</i>     | <i>Clostridium XIVa</i> | 0.88 $\pm$ 0.14 $\downarrow$ *** | 1.97 $\pm$ 0.86  | 1.63 $\pm$ 0.32 $\downarrow$    | 3.66 $\pm$ 1.14** $\uparrow$    | 5.68 $\pm$ 1.86*** $\uparrow$   | 10.8 $\pm$ 3.16*** $\downarrow$ | 4.41 $\pm$ 1.29** $\uparrow$   | 5.29 $\pm$ 1.21*** $\uparrow$   |
| <i>Bacteroidetes</i>  | <i>Tannerella</i>       | 3.9 $\pm$ 1.11 $\uparrow$ ***    | 2.65 $\pm$ 0.27  | 2.93 $\pm$ 1.19* $\uparrow$     | 1.93 $\pm$ 0.36** $\downarrow$  | 2.13 $\pm$ 0.29* $\downarrow$   | 1.97 $\pm$ 0.73* $\downarrow$   | 3.64 $\pm$ 1.20*** $\uparrow$  | 2.75 $\pm$ 1.34 $\downarrow$    |
| <i>Proteobacteria</i> | <i>Helicobacter</i>     | 1.68 $\pm$ 0.21 $\downarrow$ *   | 2.79 $\pm$ 0.77  | 2.12 $\pm$ 0.77 $\downarrow$    | 1.19 $\pm$ 0.43* $\downarrow$   | 2.59 $\pm$ 1.10 $\downarrow$    | 2.21 $\pm$ 0.62 $\downarrow$    | 1.85 $\pm$ 0.29* $\downarrow$  | 7.05 $\pm$ 2.10 $\uparrow$      |
| <i>Bacteroidetes</i>  | <i>Coprobacter</i>      | 3.03 $\pm$ 0.43 $\downarrow$ *** | 3.8 $\pm$ 0.17   | 2.68 $\pm$ 0.21*** $\downarrow$ | 1.92 $\pm$ 0.28*** $\downarrow$ | 1.58 $\pm$ 0.75*** $\downarrow$ | 2.71 $\pm$ 1.17 $\downarrow$    | 2.34 $\pm$ 0.39** $\downarrow$ | 2.92 $\pm$ 0.98 $\downarrow$    |
| <i>Bacteroidetes</i>  | <i>Bacteroides</i>      | 7.33 $\pm$ 1.76 $\uparrow$ ***   | 2.14 $\pm$ 0.54  | 1.57 $\pm$ 0.21* $\downarrow$   | 2.64 $\pm$ 0.29 $\uparrow$      | 1.04 $\pm$ 0.87* $\downarrow$   | 2.65 $\pm$ 1.09 $\uparrow$      | 1.91 $\pm$ 0.76 $\downarrow$   | 1.04 $\pm$ 0.66** $\downarrow$  |
