# Supplementary material for: Modulation of the gut microbiota by the mixture of fish oil and krill oil in high-fat diet-induced obesity mice
Source: PubMed Central journal article supplement (PMC5633193; doi:10.1371/journal.pone.0186216), 2017-10-09
Supplement: pone.0186216.s009.pdf [file pone.0186216.s009.pdf]

**Table S9.** Taxonomic assignments of 82 OTUs responding to oil treatment identified by redundancy analysis (RDA).

|         | phylum                 | class                   | order                     | family                     | genus                                     |
|---------|------------------------|-------------------------|---------------------------|----------------------------|-------------------------------------------|
| OTU2708 | <i>Bacteroidetes</i>   | <i>Bacteroidia</i>      | <i>Bacteroidales</i>      | <i>Porphyromonadaceae</i>  | <i>Coprobacter</i>                        |
| OTU14   | <i>Firmicutes</i>      | <i>Bacilli</i>          | <i>Lactobacillales</i>    | <i>Lactobacillaceae</i>    | <i>Lactobacillus</i>                      |
| OTU135  | <i>Firmicutes</i>      | <i>Clostridia</i>       | <i>Clostridiales</i>      | <i>Lachnospiraceae</i>     | <i>Clostridium XIVa</i>                   |
| OTU149  | <i>Firmicutes</i>      | <i>Clostridia</i>       | <i>Clostridiales</i>      | <i>Ruminococcaceae</i>     | <i>Unclassified</i>                       |
| OTU36   | <i>Firmicutes</i>      | <i>Clostridia</i>       | <i>Clostridiales</i>      | <i>Lachnospiraceae</i>     | <i>Clostridium XIVa</i>                   |
| OTU42   | <i>Firmicutes</i>      | <i>Clostridia</i>       | <i>Clostridiales</i>      | <i>Lachnospiraceae</i>     | <i>Marvinbryantia</i>                     |
| OTU45   | <i>Firmicutes</i>      | <i>Clostridia</i>       | <i>Clostridiales</i>      | <i>Lachnospiraceae</i>     | <i>Hungatella</i>                         |
| OTU136  | <i>Firmicutes</i>      | <i>Clostridia</i>       | <i>Clostridiales</i>      | <i>Ruminococcaceae</i>     | <i>Ruminococcus</i>                       |
| OTU191  | <i>Bacteroidetes</i>   | <i>Bacteroidia</i>      | <i>Bacteroidales</i>      | <i>Porphyromonadaceae</i>  | <i>Barnesiella</i>                        |
| OTU81   | <i>Firmicutes</i>      | <i>Clostridia</i>       | <i>Clostridiales</i>      | <i>Lachnospiraceae</i>     | <i>Lachnospiraceae_incertae_sedis</i>     |
| OTU56   | <i>Firmicutes</i>      | <i>Clostridia</i>       | <i>Clostridiales</i>      | <i>Lachnospiraceae</i>     | <i>Unclassified</i>                       |
| OTU128  | <i>Deferribacteres</i> | <i>Deferribacteres</i>  | <i>Deferribacterales</i>  | <i>Deferribacteraceae</i>  | <i>Mucispirillum</i>                      |
| OTU6298 | <i>Bacteroidetes</i>   | <i>Bacteroidia</i>      | <i>Bacteroidales</i>      | <i>Porphyromonadaceae</i>  | <i>Barnesiella</i>                        |
| OTU475  | <i>Firmicutes</i>      | <i>Clostridia</i>       | <i>Clostridiales</i>      | <i>Ruminococcaceae</i>     | <i>Oscillibacter</i>                      |
| OTU92   | <i>Bacteroidetes</i>   | <i>Bacteroidia</i>      | <i>Bacteroidales</i>      | <i>Porphyromonadaceae</i>  | <i>Odoribacter</i>                        |
| OTU97   | <i>Firmicutes</i>      | <i>Clostridia</i>       | <i>Clostridiales</i>      | <i>Lachnospiraceae</i>     | <i>Clostridium XIVa</i>                   |
| OTU179  | <i>Firmicutes</i>      | <i>Erysipelotrichia</i> | <i>Erysipelotrichales</i> | <i>Erysipelotrichaceae</i> | <i>Erysipelotrichaceae_incertae_sedis</i> |
| OTU304  | <i>Firmicutes</i>      | <i>Erysipelotrichia</i> | <i>Erysipelotrichales</i> | <i>Erysipelotrichaceae</i> | <i>Erysipelotrichaceae_incertae_sedis</i> |
| OTU8711 | <i>Firmicutes</i>      | <i>Clostridia</i>       | <i>Clostridiales</i>      | <i>Ruminococcaceae</i>     | <i>Unclassified</i>                       |
| OTU562  | <i>Firmicutes</i>      | <i>Clostridia</i>       | <i>Clostridiales</i>      | <i>Ruminococcaceae</i>     | <i>Clostridium IV</i>                     |
| OTU335  | <i>Firmicutes</i>      | <i>Clostridia</i>       | <i>Clostridiales</i>      | <i>Unclassified</i>        | <i>Unclassified</i>                       |
| OTU409  | <i>Firmicutes</i>      | <i>Clostridia</i>       | <i>Clostridiales</i>      | <i>Lachnospiraceae</i>     | <i>Unclassified</i>                       |

|          |                       |                            |                          |                           |                                        |
|----------|-----------------------|----------------------------|--------------------------|---------------------------|----------------------------------------|
| OTU521   | <i>Proteobacteria</i> | <i>Deltaproteobacteria</i> | <i>Bdellovibrionales</i> | <i>Bdellovibrionaceae</i> | <i>Vampirovibrio</i>                   |
| OTU342   | <i>Firmicutes</i>     | <i>Clostridia</i>          | <i>Clostridiales</i>     | <i>Lachnospiraceae</i>    | <i>Unclassified</i>                    |
| OTU51    | <i>Firmicutes</i>     | <i>Clostridia</i>          | <i>Clostridiales</i>     | <i>Ruminococcaceae</i>    | <i>Oscillibacter</i>                   |
| OTU174   | <i>Firmicutes</i>     | <i>Clostridia</i>          | <i>Clostridiales</i>     | <i>Lachnospiraceae</i>    | <i>Ruminococcus2</i>                   |
| OTU142   | <i>Bacteroidetes</i>  | <i>Bacteroidia</i>         | <i>Bacteroidales</i>     | <i>Porphyromonadaceae</i> | <i>Falsiporphyromonas</i>              |
| OTU1084  | <i>Bacteroidetes</i>  | <i>Bacteroidia</i>         | <i>Bacteroidales</i>     | <i>Porphyromonadaceae</i> | <i>Coprobacter</i>                     |
| OTU440   | <i>Firmicutes</i>     | <i>Clostridia</i>          | <i>Clostridiales</i>     | <i>Ruminococcaceae</i>    | <i>Anaerotruncus</i>                   |
| OTU13    | <i>Bacteroidetes</i>  | <i>Bacteroidia</i>         | <i>Bacteroidales</i>     | <i>Porphyromonadaceae</i> | <i>Parabacteroides</i>                 |
| OTU161   | <i>Bacteroidetes</i>  | <i>Bacteroidia</i>         | <i>Bacteroidales</i>     | <i>Rikenellaceae</i>      | <i>Alistipes</i>                       |
| OTU762   | <i>Firmicutes</i>     | <i>Clostridia</i>          | <i>Clostridiales</i>     | <i>Ruminococcaceae</i>    | <i>Anaerotruncus</i>                   |
| OTU178   | <i>Bacteroidetes</i>  | <i>Bacteroidia</i>         | <i>Bacteroidales</i>     | <i>Rikenellaceae</i>      | <i>Alistipes</i>                       |
| OTU146   | <i>Bacteroidetes</i>  | <i>Bacteroidia</i>         | <i>Bacteroidales</i>     | <i>Porphyromonadaceae</i> | <i>Barnesiella</i>                     |
| OTU147   | <i>Bacteroidetes</i>  | <i>Bacteroidia</i>         | <i>Bacteroidales</i>     | <i>Porphyromonadaceae</i> | <i>Barnesiella</i>                     |
| OTU388   | <i>Firmicutes</i>     | <i>Clostridia</i>          | <i>Clostridiales</i>     | <i>Lachnospiraceae</i>    | <i>Unclassified</i>                    |
| OTU642   | <i>Firmicutes</i>     | <i>Clostridia</i>          | <i>Clostridiales</i>     | <i>Ruminococcaceae</i>    | <i>Acetanaerobacterium</i>             |
| OTU16    | <i>Bacteroidetes</i>  | <i>Bacteroidia</i>         | <i>Bacteroidales</i>     | <i>Rikenellaceae</i>      | <i>Alistipes</i>                       |
| OTU470   | <i>Firmicutes</i>     | <i>Clostridia</i>          | <i>Clostridiales</i>     | <i>Lachnospiraceae</i>    | <i>Lachnoanaerobaculum</i>             |
| OTU16301 | <i>Firmicutes</i>     | <i>Bacilli</i>             | <i>Lactobacillales</i>   | <i>Lactobacillaceae</i>   | <i>Lactobacillus</i>                   |
| OTU158   | <i>Firmicutes</i>     | <i>Clostridia</i>          | <i>Clostridiales</i>     | <i>Lachnospiraceae</i>    | <i>Lachnospiraceae_incertain_sedis</i> |
| OTU478   | <i>Firmicutes</i>     | <i>Clostridia</i>          | <i>Clostridiales</i>     | <i>Ruminococcaceae</i>    | <i>Flavonifractor</i>                  |
| OTU724   | <i>Firmicutes</i>     | <i>Clostridia</i>          | <i>Clostridiales</i>     | <i>Lachnospiraceae</i>    | <i>Unclassified</i>                    |
| OTU321   | <i>Unclassified</i>   | <i>Unclassified</i>        | <i>Unclassified</i>      | <i>Unclassified</i>       | <i>Unclassified</i>                    |
| OTU522   | <i>Actinobacteria</i> | <i>Actinobacteria</i>      | <i>Bifidobacteriales</i> | <i>Bifidobacteriaceae</i> | <i>Bifidobacterium</i>                 |
| OTU769   | <i>Firmicutes</i>     | <i>Clostridia</i>          | <i>Clostridiales</i>     | <i>Ruminococcaceae</i>    | <i>Intestinimonas</i>                  |
| OTU112   | <i>Firmicutes</i>     | <i>Clostridia</i>          | <i>Clostridiales</i>     | <i>NA</i>                 | <i>Unclassified</i>                    |

|          |                        |                            |                           |                            |                         |
|----------|------------------------|----------------------------|---------------------------|----------------------------|-------------------------|
| OTU636   | <i>Proteobacteria</i>  | <i>Alphaproteobacteria</i> | <i>Sphingomonadales</i>   | <i>Sphingomonadaceae</i>   | <i>Novosphingobium</i>  |
| OTU839   | <i>Actinobacteria</i>  | <i>Actinobacteria</i>      | <i>Actinomycetales</i>    | <i>Intrasporangiaceae</i>  | <i>Terracoccus</i>      |
| OTU3534  | <i>Actinobacteria</i>  | <i>Actinobacteria</i>      | <i>Acidimicrobiales</i>   | <i>Acidimicrobiaceae</i>   | <i>Ilumatobacter</i>    |
| OTU397   | <i>Firmicutes</i>      | <i>Clostridia</i>          | <i>Clostridiales</i>      | NA                         | <i>Unclassified</i>     |
| OTU366   | <i>Planctomycetes</i>  | <i>Planctomycetia</i>      | <i>Planctomycetales</i>   | <i>Planctomycetaceae</i>   | <i>Isosphaera</i>       |
| OTU3624  | <i>Firmicutes</i>      | <i>Clostridia</i>          | <i>Clostridiales</i>      | <i>Unclassified</i>        | <i>Unclassified</i>     |
| OTU190   | <i>Actinobacteria</i>  | <i>Actinobacteria</i>      | <i>Actinomycetales</i>    | <i>Unclassified</i>        | <i>Unclassified</i>     |
| OTU153   | <i>Firmicutes</i>      | <i>Clostridia</i>          | <i>Clostridiales</i>      | <i>Christensenellaceae</i> | <i>Christensenella</i>  |
| OTU3681  | <i>Proteobacteria</i>  | <i>Alphaproteobacteria</i> | <i>Rhodobacterales</i>    | <i>Rhodobacteraceae</i>    | <i>Rhodobacter</i>      |
| OTU288   | <i>Firmicutes</i>      | <i>Clostridia</i>          | <i>Clostridiales</i>      | <i>Unclassified</i>        | <i>Unclassified</i>     |
| OTU433   | <i>Firmicutes</i>      | <i>Clostridia</i>          | <i>Clostridiales</i>      | <i>Lachnospiraceae</i>     | <i>Clostridium XIVa</i> |
| OTU487   | <i>Planctomycetes</i>  | <i>Phycisphaerae</i>       | <i>Tepidisphaerales</i>   | <i>Tepidisphaeraceae</i>   | <i>Tepidisphaera</i>    |
| OTU763   | <i>Firmicutes</i>      | <i>Clostridia</i>          | <i>Clostridiales</i>      | <i>Lachnospiraceae</i>     | <i>Roseburia</i>        |
| OTU87    | <i>Firmicutes</i>      | <i>Erysipelotrichia</i>    | <i>Erysipelotrichales</i> | <i>Erysipelotrichaceae</i> | <i>Allobaculum</i>      |
| OTU555   | <i>Proteobacteria</i>  | <i>Betaproteobacteria</i>  | <i>Burkholderiales</i>    | <i>Comamonadaceae</i>      | <i>Hydrogenophaga</i>   |
| OTU11205 | <i>Firmicutes</i>      | <i>Clostridia</i>          | <i>Clostridiales</i>      | <i>Ruminococcaceae</i>     | <i>Cellulosibacter</i>  |
| OTU314   | <i>Verrucomicrobia</i> | <i>Spartobacteria</i>      | NA                        | NA                         | <i>Terrimicrobium</i>   |
| OTU346   | <i>Firmicutes</i>      | <i>Clostridia</i>          | <i>Clostridiales</i>      | <i>Unclassified</i>        | <i>Unclassified</i>     |
| OTU15    | <i>Firmicutes</i>      | <i>Erysipelotrichia</i>    | <i>Erysipelotrichales</i> | <i>Erysipelotrichaceae</i> | <i>Allobaculum</i>      |
| OTU109   | <i>Bacteroidetes</i>   | <i>Bacteroidia</i>         | <i>Bacteroidales</i>      | <i>Porphyromonadaceae</i>  | <i>Unclassified</i>     |
| OTU6     | <i>Proteobacteria</i>  | <i>Deltaproteobacteria</i> | <i>Desulfovibrionales</i> | <i>Desulfovibrionaceae</i> | <i>Bilophila</i>        |
| OTU345   | <i>Proteobacteria</i>  | <i>Betaproteobacteria</i>  | <i>Methylophilales</i>    | <i>Methylophilaceae</i>    | <i>Methylotenera</i>    |
| OTU381   | <i>Firmicutes</i>      | <i>Clostridia</i>          | <i>Clostridiales</i>      | <i>Unclassified</i>        | <i>Unclassified</i>     |
| OTU106   | <i>Bacteroidetes</i>   | <i>Bacteroidia</i>         | <i>Bacteroidales</i>      | <i>Porphyromonadaceae</i>  | <i>Barnesiella</i>      |
| OTU25    | <i>Bacteroidetes</i>   | <i>Bacteroidia</i>         | <i>Bacteroidales</i>      | <i>Porphyromonadaceae</i>  | <i>Coprobacter</i>      |

|        |                      |                         |                           |                              |                         |
|--------|----------------------|-------------------------|---------------------------|------------------------------|-------------------------|
| OTU284 | <i>Firmicutes</i>    | <i>Clostridia</i>       | <i>Clostridiales</i>      | <i>Lachnospiraceae</i>       | <i>Clostridium XIVa</i> |
| OTU124 | <i>Firmicutes</i>    | <i>Clostridia</i>       | <i>Clostridiales</i>      | <i>Unclassified</i>          | <i>Unclassified</i>     |
| OTU207 | <i>Firmicutes</i>    | <i>Clostridia</i>       | <i>Clostridiales</i>      | <i>Peptostreptococcaceae</i> | <i>Romboutsia</i>       |
| OTU3   | <i>Firmicutes</i>    | <i>Bacilli</i>          | <i>Lactobacillales</i>    | <i>Lactobacillaceae</i>      | <i>Lactobacillus</i>    |
| OTU285 | <i>Firmicutes</i>    | <i>Clostridia</i>       | <i>Clostridiales</i>      | <i>Ruminococcaceae</i>       | <i>Unclassified</i>     |
| OTU33  | <i>Bacteroidetes</i> | <i>Bacteroidia</i>      | <i>Bacteroidales</i>      | <i>Porphyromonadaceae</i>    | <i>Barnesiella</i>      |
| OTU39  | <i>Bacteroidetes</i> | <i>Bacteroidia</i>      | <i>Bacteroidales</i>      | <i>Porphyromonadaceae</i>    | <i>Barnesiella</i>      |
| OTU29  | <i>Firmicutes</i>    | <i>Clostridia</i>       | <i>Clostridiales</i>      | <i>Unclassified</i>          | <i>Unclassified</i>     |
| OTU91  | <i>Firmicutes</i>    | <i>Erysipelotrichia</i> | <i>Erysipelotrichales</i> | <i>Erysipelotrichaceae</i>   | <i>Turicibacter</i>     |
| OTU22  | <i>Bacteroidetes</i> | <i>Bacteroidia</i>      | <i>Bacteroidales</i>      | <i>Porphyromonadaceae</i>    | <i>Barnesiella</i>      |
