# Supplementary material for: Modulation of the gut microbiota by the mixture of fish oil and krill oil in high-fat diet-induced obesity mice
Source: PubMed Central journal article supplement (PMC5633193; doi:10.1371/journal.pone.0186216), 2017-10-09
Supplement: pone.0186216.s010.pdf [file pone.0186216.s010.pdf]

**S10 Table. Relative abundance of the 82 OTUs responding to oil treatment identified by redundancy analysis (RDA).** Data are presented as the means  $\pm$  S.D and analyzed by Mann-Whitney test, \*\*\* $P$ <0.001,

\*\* $P$ <0.01 and \* $P$ <0.05 vs the HFD group.

| OUT     | Control (%)          | HFD (%)           | HFD+M (%)            | HFD+FO600 (%)        | HFD+KO600 (%)        | HFD+FO300KO300 (%)   | HFD+FO400KO200 (%)   | HFD+FO450KO150 (%)   |
|---------|----------------------|-------------------|----------------------|----------------------|----------------------|----------------------|----------------------|----------------------|
| OTU2708 | 1.381 $\pm$ 0.047*** | 0.004 $\pm$ 0.001 | 0.653 $\pm$ 0.024**  | 0.003 $\pm$ 0.001    | 0.006 $\pm$ 0.002    | 0.000 $\pm$ 0.000    | 0.000 $\pm$ 0.000    | 0.042 $\pm$ 0.011*   |
| OTU14   | 1.044 $\pm$ 0.013*** | 0.004 $\pm$ 0.001 | 0.122 $\pm$ 0.036*   | 0.019 $\pm$ 0.001    | 0.000 $\pm$ 0.000    | 1.517 $\pm$ 0.431*** | 0.015 $\pm$ 0.006    | 0.011 $\pm$ 0.004    |
| OTU135  | 2.705 $\pm$ 0.064*** | 0.011 $\pm$ 0.004 | 0.158 $\pm$ 0.047*   | 0.003 $\pm$ 0.001**  | 0.069 $\pm$ 0.012*   | 1.094 $\pm$ 0.179*** | 0.030 $\pm$ 0.012*   | 0.025 $\pm$ 0.009*   |
| OTU149  | 0.774 $\pm$ 0.110*** | 0.007 $\pm$ 0.002 | 0.003 $\pm$ 0.001    | 0.000 $\pm$ 0.000    | 0.715 $\pm$ 0.132*** | 0.101 $\pm$ 0.065    | 0.009 $\pm$ 0.001    | 0.616 $\pm$ 0.077*** |
| OTU36   | 0.273 $\pm$ 0.018*** | 0.004 $\pm$ 0.002 | 0.044 $\pm$ 0.012**  | 0.000 $\pm$ 0.000    | 0.000 $\pm$ 0.000    | 0.000 $\pm$ 0.000    | 0.000 $\pm$ 0.000    | 0.002 $\pm$ 0.001    |
| OTU42   | 2.409 $\pm$ 0.206*** | 0.036 $\pm$ 0.012 | 0.199 $\pm$ 0.031**  | 0.048 $\pm$ 0.012    | 0.013 $\pm$ 0.032    | 0.124 $\pm$ 0.029**  | 0.310 $\pm$ 0.101**  | 0.789 $\pm$ 0.145*** |
| OTU45   | 1.077 $\pm$ 0.209*** | 0.021 $\pm$ 0.011 | 4.225 $\pm$ 1.121*** | 0.044 $\pm$ 0.011*   | 0.142 $\pm$ 0.034*   | 3.453 $\pm$ 1.318*** | 0.513 $\pm$ 0.032**  | 0.164 $\pm$ 0.046*   |
| OTU136  | 0.607 $\pm$ 0.018*** | 0.018 $\pm$ 0.002 | 0.096 $\pm$ 0.033*   | 0.022 $\pm$ 0.003    | 0.016 $\pm$ 0.004    | 0.203 $\pm$ 0.067**  | 0.169 $\pm$ 0.056**  | 0.246 $\pm$ 0.077**  |
| OTU191  | 0.368 $\pm$ 0.121*** | 0.011 $\pm$ 0.002 | 0.000 $\pm$ 0.000    | 0.000 $\pm$ 0.000    | 0.000 $\pm$ 0.000    | 0.000 $\pm$ 0.000    | 0.055 $\pm$ 0.007*   | 0.002 $\pm$ 0.001    |
| OTU81   | 0.114 $\pm$ 0.006*** | 0.004 $\pm$ 0.001 | 0.000 $\pm$ 0.000    | 0.000 $\pm$ 0.000    | 0.003 $\pm$ 0.001    | 0.055 $\pm$ 0.019*   | 0.000 $\pm$ 0.000    | 0.002 $\pm$ 0.001    |
| OTU56   | 0.091 $\pm$ 0.017**  | 0.004 $\pm$ 0.002 | 0.000 $\pm$ 0.000    | 0.016 $\pm$ 0.021    | 0.019 $\pm$ 0.003    | 0.014 $\pm$ 0.007    | 0.000 $\pm$ 0.000    | 0.000 $\pm$ 0.000    |
| OTU128  | 0.095 $\pm$ 0.010**  | 0.004 $\pm$ 0.001 | 0.085 $\pm$ 0.023**  | 0.003 $\pm$ 0.001    | 0.016 $\pm$ 0.002*   | 0.029 $\pm$ 0.011*   | 0.000 $\pm$ 0.000    | 0.067 $\pm$ 0.011**  |
| OTU6298 | 0.082 $\pm$ 0.023**  | 0.004 $\pm$ 0.001 | 0.000 $\pm$ 0.000    | 0.000 $\pm$ 0.000    | 0.003 $\pm$ 0.001    | 0.002 $\pm$ 0.001    | 0.006 $\pm$ 0.001    | 0.002 $\pm$ 0.001    |
| OTU475  | 0.084 $\pm$ 0.024**  | 0.004 $\pm$ 0.002 | 0.616 $\pm$ 0.217*** | 0.006 $\pm$ 0.002*   | 0.000 $\pm$ 0.000*   | 0.040 $\pm$ 0.004*   | 0.000 $\pm$ 0.000*   | 0.110 $\pm$ 0.023**  |
| OTU92   | 1.082 $\pm$ 0.327*** | 0.046 $\pm$ 0.014 | 0.609 $\pm$ 0.206**  | 0.388 $\pm$ 0.121**  | 0.125 $\pm$ 0.015**  | 1.366 $\pm$ 0.198*** | 0.110 $\pm$ 0.059**  | 0.226 $\pm$ 0.058**  |
| OTU97   | 0.083 $\pm$ 0.013**  | 0.004 $\pm$ 0.001 | 0.107 $\pm$ 0.048*** | 0.064 $\pm$ 0.012**  | 0.457 $\pm$ 0.143*** | 0.710 $\pm$ 0.119*** | 0.479 $\pm$ 0.121*** | 0.540 $\pm$ 0.146*** |
| OTU179  | 0.154 $\pm$ 0.015*** | 0.007 $\pm$ 0.002 | 0.328 $\pm$ 0.076*** | 0.082 $\pm$ 0.023**  | 0.162 $\pm$ 0.045*** | 0.023 $\pm$ 0.012**  | 0.058 $\pm$ 0.011*   | 0.025 $\pm$ 0.004*   |
| OTU304  | 0.075 $\pm$ 0.009**  | 0.004 $\pm$ 0.001 | 0.018 $\pm$ 0.001*   | 0.022 $\pm$ 0.003*   | 0.066 $\pm$ 0.011*   | 0.002 $\pm$ 0.001    | 0.009 $\pm$ 0.002    | 0.019 $\pm$ 0.006*   |
| OTU8711 | 0.146 $\pm$ 0.053**  | 0.007 $\pm$ 0.003 | 0.000 $\pm$ 0.000    | 0.000 $\pm$ 0.000    | 0.033 $\pm$ 0.021*   | 0.139 $\pm$ 0.065*** | 0.006 $\pm$ 0.001    | 0.005 $\pm$ 0.001    |
| OTU562  | 0.067 $\pm$ 0.033**  | 0.004 $\pm$ 0.001 | 0.051 $\pm$ 0.012*   | 0.006 $\pm$ 0.001    | 0.000 $\pm$ 0.000    | 0.098 $\pm$ 0.043*   | 0.076 $\pm$ 0.021*   | 0.019 $\pm$ 0.002    |
| OTU335  | 0.903 $\pm$ 0.207*** | 0.060 $\pm$ 0.021 | 0.000 $\pm$ 0.000*   | 0.025 $\pm$ 0.012    | 0.036 $\pm$ 0.021    | 0.008 $\pm$ 0.001*   | 0.298 $\pm$ 0.039**  | 0.107 $\pm$ 0.031**  |
| OTU409  | 0.058 $\pm$ 0.018**  | 0.004 $\pm$ 0.001 | 0.133 $\pm$ 0.046*** | 0.000 $\pm$ 0.000    | 0.069 $\pm$ 0.024**  | 0.063 $\pm$ 0.014**  | 0.012 $\pm$ 0.004*   | 0.031 $\pm$ 0.010**  |
| OTU521  | 0.054 $\pm$ 0.023**  | 0.004 $\pm$ 0.001 | 0.003 $\pm$ 0.001    | 0.022 $\pm$ 0.002*   | 0.003 $\pm$ 0.001    | 0.017 $\pm$ 0.001    | 0.003 $\pm$ 0.001    | 0.016 $\pm$ 0.004    |
| OTU342  | 0.109 $\pm$ 0.076*** | 0.007 $\pm$ 0.002 | 0.059 $\pm$ 0.014*   | 0.000 $\pm$ 0.000    | 0.119 $\pm$ 0.021*** | 0.133 $\pm$ 0.054*** | 0.147 $\pm$ 0.026*** | 0.169 $\pm$ 0.035*** |
| OTU51   | 0.766 $\pm$ 0.298**  | 0.053 $\pm$ 0.012 | 0.369 $\pm$ 0.101**  | 0.0191 $\pm$ 0.045*  | 0.132 $\pm$ 0.021*   | 0.200 $\pm$ 0.100*   | 0.113 $\pm$ 0.038*   | 0.212 $\pm$ 0.043*   |
| OTU174  | 0.156 $\pm$ 0.026**  | 0.010 $\pm$ 0.003 | 0.022 $\pm$ 0.003    | 0.016 $\pm$ 0.023    | 0.049 $\pm$ 0.021    | 0.092 $\pm$ 0.012*   | 0.003 $\pm$ 0.001    | 0.512 $\pm$ 0.154**  |
| OTU142  | 0.453 $\pm$ 0.021**  | 0.031 $\pm$ 0.010 | 0.280 $\pm$ 0.076**  | 0.012 $\pm$ 0.004    | 0.062 $\pm$ 0.003    | 0.191 $\pm$ 0.012**  | 0.036 $\pm$ 0.012    | 0.019 $\pm$ 0.005    |
| OTU1084 | 0.103 $\pm$ 0.018**  | 0.007 $\pm$ 0.001 | 0.000 $\pm$ 0.000    | 0.000 $\pm$ 0.000    | 0.069 $\pm$ 0.023*   | 0.174 $\pm$ 0.025**  | 0.006 $\pm$ 0.001    | 0.028 $\pm$ 0.011*   |
| OTU440  | 0.054 $\pm$ 0.023*   | 0.004 $\pm$ 0.001 | 0.063 $\pm$ 0.015*   | 0.019 $\pm$ 0.021    | 0.000 $\pm$ 0.000    | 0.052 $\pm$ 0.012*   | 0.033 $\pm$ 0.001*   | 0.016 $\pm$ 0.004    |
| OTU13   | 0.412 $\pm$ 0.078**  | 0.031 $\pm$ 0.009 | 0.048 $\pm$ 0.013    | 0.480 $\pm$ 0.102    | 0.125 $\pm$ 0.054**  | 0.060 $\pm$ 0.004*   | 0.089 $\pm$ 0.021*   | 0.082 $\pm$ 0.013*   |
| OTU161  | 0.218 $\pm$ 0.097**  | 0.017 $\pm$ 0.007 | 0.052 $\pm$ 0.011*   | 0.073 $\pm$ 0.021*   | 0.006 $\pm$ 0.001*   | 0.174 $\pm$ 0.034**  | 0.027 $\pm$ 0.004    | 0.022 $\pm$ 0.001    |
| OTU762  | 0.085 $\pm$ 0.025*   | 0.007 $\pm$ 0.001 | 0.000 $\pm$ 0.000    | 0.000 $\pm$ 0.000    | 0.026 $\pm$ 0.006*   | 0.003 $\pm$ 0.001    | 0.015 $\pm$ 0.002    | 0.002 $\pm$ 0.001    |
| OTU178  | 0.293 $\pm$ 0.056**  | 0.028 $\pm$ 0.012 | 0.487 $\pm$ 0.112*** | 0.470 $\pm$ 0.121*** | 0.046 $\pm$ 0.013*   | 0.133 $\pm$ 0.056**  | 0.043 $\pm$ 0.002*   | 0.036 $\pm$ 0.009*   |
| OTU146  | 0.048 $\pm$ 0.012*   | 0.004 $\pm$ 0.001 | 0.004 $\pm$ 0.001    | 0.003 $\pm$ 0.001    | 0.000 $\pm$ 0.000    | 0.26 $\pm$ 0.012*    | 0.000 $\pm$ 0.000    | 0.002 $\pm$ 0.001    |
| OTU147  | 0.044 $\pm$ 0.009**  | 0.004 $\pm$ 0.001 | 0.048 $\pm$ 0.012**  | 0.209 $\pm$ 0.101*** | 0.013 $\pm$ 0.003*   | 0.023 $\pm$ 0.014*   | 0.101 $\pm$ 0.034*** | 0.090 $\pm$ 0.023**  |
| OTU388  | 0.048 $\pm$ 0.002*   | 0.004 $\pm$ 0.002 | 0.004 $\pm$ 0.001    | 0.060 $\pm$ 0.021*   | 0.029 $\pm$ 0.011    | 0.014 $\pm$ 0.003    | 0.003 $\pm$ 0.001    | 0.107 $\pm$ 0.048**  |
| OTU642  | 0.044 $\pm$ 0.022**  | 0.004 $\pm$ 0.001 | 0.026 $\pm$ 0.007*   | 0.006 $\pm$ 0.001    | 0.000 $\pm$ 0.000    | 0.052 $\pm$ 0.017**  | 0.000 $\pm$ 0.000    | 0.065 $\pm$ 0.017**  |

|          |                |             |                |                |                |                |                |                |
|----------|----------------|-------------|----------------|----------------|----------------|----------------|----------------|----------------|
| OTU16    | 1.463±0.768*** | 0.142±0.046 | 0.631±0.127**  | 0.845±0.286**  | 0.830±0.108**  | 0.710±0.190**  | 0.055±0.010*   | 1.519±0.466*** |
| OTU470   | 0.072±0.023*   | 0.007±0.003 | 0.011±0.004    | 0.000±0.000    | 0.013±0.003    | 0.000±0.000    | 0.046±0.010*   | 0.000±0.000    |
| OTU16301 | 0.073±0.018*   | 0.007±0.002 | 0.000±0.000    | 0.000±0.000    | 0.000±0.000    | 0.000±0.000    | 0.000±0.000    | 0.000±0.000    |
| OTU158   | 0.172±0.023**  | 0.018±0.005 | 0.007±0.001*   | 0.019±0.012    | 0.000±0.000*   | 0.011±0.001    | 0.018±0.006    | 0.025±0.008    |
| OTU478   | 0.104±0.029*** | 0.011±0.002 | 0.185±0.056*** | 0.000±0.000*   | 0.013±0.001    | 0.182±0.002*** | 0.061±0.009**  | 0.008±0.001    |
| OTU724   | 0.103±0.018*** | 0.011±0.002 | 0.026±0.002    | 0.003±0.001    | 0.000±0.000    | 0.040±0.010**  | 0.049±0.021**  | 0.002±0.001    |
| OTU321   | 0.105±0.021**  | 0.011±0.001 | 0.078±0.014**  | 0.028±0.014    | 0.023±0.012    | 0.063±0.010**  | 0.043±0.011*   | 0.045±0.014*   |
| OTU522   | 0.037±0.006*   | 0.004±0.001 | 0.089±0.021**  | 0.000±0.000    | 0.003±0.001    | 0.000±0.000    | 0.000±0.000    | 0.000±0.000    |
| OTU769   | 0.033±0.001**  | 0.004±0.001 | 0.074±0.021*** | 0.000±0.000    | 0.003±0.001    | 0.017±0.002*   | 0.003±0.001    | 0.016±0.003*   |
| OTU112   | 0.006±0.001*   | 0.060±0.010 | 0.022±0.006*   | 0.003±0.001*   | 0.218±0.057*** | 0.011±0.001*   | 0.000±0.000*   | 0.147±0.026*** |
| OTU636   | 0.007±0.001**  | 0.060±0.014 | 0.000±0.000**  | 0.006±0.001**  | 0.006±0.001**  | 0.008±0.001**  | 0.021±0.006*   | 0.011±0.005*   |
| OTU839   | 0.003±0.002**  | 0.032±0.010 | 0.002±0.001**  | 0.003±0.001**  | 0.013±0.004    | 0.017±0.011*   | 0.021±0.011*   | 0.006±0.002**  |
| OTU3534  | 0.003±0.001**  | 0.032±0.005 | 0.000±0.000**  | 0.000±0.000*   | 0.006±0.001**  | 0.000±0.000**  | 0.015±0.002*   | 0.008±0.002**  |
| OTU397   | 0.013±0.004*** | 0.135±0.062 | 0.004±0.001*** | 0.006±0.002*** | 0.089±0.021**  | 0.017±0.001*** | 0.003±0.001*** | 0.093±0.016**  |
| OTU366   | 0.007±0.002**  | 0.067±0.013 | 0.004±0.001**  | 0.016±0.002**  | 0.013±0.002**  | 0.011±0.001**  | 0.030±0.005*   | 0.019±0.011**  |
| OTU3624  | 0.013±0.007**  | 0.139±0.052 | 0.011±0.004**  | 0.003±0.001*** | 0.016±0.013**  | 0.029±0.012**  | 0.039±0.006**  | 0.000±0.000*** |
| OTU190   | 0.023±0.011*** | 0.249±0.027 | 0.007±0.002*** | 0.064±0.012*** | 0.079±0.021*** | 0.034±0.002*** | 0.153±0.014**  | 0.067±0.017*** |
| OTU153   | 0.009±0.002*** | 0.107±0.044 | 0.476±0.127*** | 0.461±0.112*** | 0.205±0.034*   | 0.269±0.102*   | 0.439±0.245*** | 0.113±0.043    |
| OTU3681  | 0.003±0.001    | 0.004±0.001 | 0.000±0.000    | 0.000±0.000    | 0.006±0.002    | 0.005±0.001    | 0.015±0.002    | 0.008±0.001    |
| OTU288   | 0.010±0.007*   | 0.117±0.002 | 0.004±0.001**  | 0.133±0.043    | 0.046±0.012*   | 0.087±0.014    | 0.485±0.113**  | 0.206±0.058*   |
| OTU433   | 0.007±0.002*   | 0.078±0.025 | 0.000±0.000*   | 0.003±0.001*   | 0.089±0.013    | 0.031±0.010*   | 0.006±0.001*   | 0.031±0.014*   |
| OTU487   | 0.003±0.001*** | 0.039±0.012 | 0.004±0.001*** | 0.009±0.001*** | 0.009±0.002*** | 0.020±0.001*   | 0.030±0.004    | 0.014±0.004**  |
| OTU763   | 0.003±0.001**  | 0.039±0.011 | 0.000±0.000**  | 0.000±0.000**  | 0.003±0.001**  | 0.034±0.012    | 0.000±0.000    | 0.033±0.011    |
| OTU87    | 0.050±0.001**  | 0.664±0.112 | 0.055±0.010**  | 1.064±0.327**  | 0.917±0.231*   | 0.026±0.010*** | 0.654±0.067    | 0.534±0.276    |
| OTU555   | 0.006±0.005**  | 0.089±0.013 | 0.000±0.000**  | 0.009±0.002**  | 0.029±0.005**  | 0.020±0.010**  | 0.049±0.012*   | 0.025±0.014**  |
| OTU11205 | 0.003±0.003*   | 0.046±0.010 | 0.000±0.000*   | 0.016±0.003*   | 0.000±0.000*   | 0.000±0.000*   | 0.000±0.000*   | 0.000±0.000*   |
| OTU314   | 0.007±0.004*   | 0.010±0.001 | 0.007±0.001*   | 0.015±0.002*   | 0.036±0.003**  | 0.043±0.019**  | 0.070±0.003*** | 0.028±0.001**  |
| OTU346   | 0.007±0.002*** | 0.103±0.010 | 0.059±0.013**  | 0.003±0.001*** | 0.066±0.021**  | 0.011±0.001*** | 0.012±0.006*** | 0.005±0.001*** |
| OTU15    | 0.060±0.005*** | 1.045±0.522 | 0.137±0.055*** | 2.777±0.476*** | 6.680±1.265*** | 0.165±0.047*** | 1.686±0.244*   | 0.531±0.012**  |
| OTU109   | 0.007±0.007**  | 0.150±0.037 | 0.000±0.000**  | 0.006±0.001**  | 0.000±0.000**  | 0.000±0.000**  | 0.000±0.000**  | 0.000±0.000**  |
| OTU6     | 0.206±0.109*** | 5.291±1.021 | 3.248±1.110*** | 1.001±0.003*** | 4.552±1.210*   | 2.147±1.001*** | 2.658±0.345*** | 4.056±1.241*   |
| OTU345   | 0.003±0.001**  | 0.092±0.010 | 0.003±0.001**  | 0.025±0.010**  | 0.019±0.004**  | 0.023±0.010**  | 0.046±0.021**  | 0.019±0.004**  |
| OTU381   | 0.007±0.003**  | 0.213±0.018 | 0.003±0.001*** | 0.231±0.102    | 0.129±0.065*   | 0.049±0.012**  | 0.460±0.110**  | 0.113±0.025*   |
| OTU106   | 0.013±0.006*** | 0.451±0.101 | 0.321±0.109*   | 1.001±0.243*** | 0.334±0.028*   | 0.484±0.121    | 2.009±0.134*** | 1.210±0.234*** |
| OTU25    | 0.047±0.012*** | 1.695±0.201 | 0.303±0.078*** | 1.176±0.453*   | 1.615±0.657    | 0.745±0.134*** | 1.299±0.456*   | 1.502±0.329*   |
| OTU284   | 0.007±0.001*** | 0.263±0.019 | 0.004±0.001*** | 0.003±0.001*** | 0.013±0.006*** | 0.029±0.010*** | 0.046±0.017*** | 0.014±0.002*** |
| OTU124   | 0.003±0.001**  | 0.163±0.017 | 0.554±0.107*** | 0.000±0.000*** | 0.152±0.035*** | 0.621±0.140*** | 0.909±0.143*** | 0.311±0.067*** |
| OTU207   | 0.003±0.001**  | 0.174±0.010 | 0.011±0.002**  | 0.162±0.045    | 0.125±0.021    | 0.058±0.021**  | 0.184±0.078    | 0.684±0.043**  |
| OTU3     | 0.142±0.057*** | 9.147±1.287 | 0.133±0.026*** | 0.479±0.104*** | 7.753±1.237*   | 2.545±0.789*** | 4.176±0.759**  | 3.089±0.987**  |
| OTU285   | 0.003±0.001*** | 0.238±0.027 | 0.018±0.003*** | 0.009±0.001*** | 0.013±0.002*** | 0.017±0.010*** | 0.000±0.000*** | 0.025±0.002*** |
| OTU33    | 0.010±0.001*** | 0.824±0.198 | 0.295±0.023*** | 0.896±0.120    | 0.486±0.103*** | 0.003±0.001*** | 0.503±0.101*** | 0.257±0.049*** |
| OTU39    | 0.023±0.011*** | 2.057±0.765 | 0.314±0.100*** | 1.630±0.453*   | 1.754±0.865**  | 0.481±0.101*** | 0.811±0.165*** | 1.072±0.045*** |

---

|       |                |             |                |                |                |                |                |                |
|-------|----------------|-------------|----------------|----------------|----------------|----------------|----------------|----------------|
| OTU29 | 0.063±0.026*** | 9.069±1.906 | 0.066±0.022*** | 4.894±1.124*** | 2.592±0.769*** | 0.148±0.024*** | 13.222±2.876** | 0.905±0.032*** |
| OTU91 | 0.003±0.001*** | 1.442±0.576 | 0.343±0.132*** | 0.972±0.120*   | 1.125±0.119    | 0.496±0.101*** | 1.210±0.117    | 2.690±0.489**  |
| OTU22 | 0.007±0.004*** | 3.214±0.769 | 2.366±0.101*   | 7.960±1.345*** | 0.629±0.123*** | 3.424±1.011    | 6.124±0.989**  | 0.079±0.018*** |

---
